## Correction: Detection of histone H3 K27M mutation and post-translational modifications in pediatric diffuse midline glioma via tissue immunohistochemistry informs diagnosis and clinical outcomes

Tina Huang<sup>2,\*</sup>, Roxanna Garcia<sup>2,\*</sup>, Jin Qi<sup>2</sup>, Rishi Lulla<sup>3</sup>, Craig Horbinski<sup>2,4</sup>, Amir Behdad<sup>4</sup>, Nitin Wadhvani<sup>5</sup>, Ali Shilatifard<sup>6</sup>, Charles James<sup>2,6</sup> and Amanda M. Saratsis<sup>1,2</sup>

<sup>1</sup> Division of Pediatric Neurosurgery, Department of Surgery, Ann & Robert H. Lurie Children's Hospital of Chicago, Chicago, IL, USA

<sup>2</sup> Department of Neurological Surgery, Northwestern University Feinberg School of Medicine, Chicago, IL, USA

<sup>3</sup> Division of Pediatric Hematology/Oncology, Hasbro Children's Hospital, The Warren Alpert Medical School of Brown University, Providence, RI, USA

<sup>4</sup> Department of Pathology, Northwestern University Feinberg School of Medicine, Chicago, IL, USA

<sup>5</sup> Department of Pathology, Ann & Robert H. Lurie Children's Hospital of Chicago, Chicago, IL, USA

<sup>6</sup> Department of Biochemistry and Molecular Genetics, Northwestern University Feinberg School of Medicine, Chicago, IL, USA

\* Co-first authors

**Published:** April 12, 2019

**Copyright:** Huang et al. This is an open-access article distributed under the terms of the Creative Commons Attribution License 3.0 (CC BY 3.0), which permits unrestricted use, distribution, and reproduction in any medium, provided the original author and source are credited.

**This article has been corrected:** The correct author information is given below:

### Amanda M. Saratsis

Original article: Oncotarget. 2018; 9:37112-37124. <https://doi.org/10.18632/oncotarget.26430>
